# Supplementary material for: Outcomes by MIC Values for Patients Treated with Isavuconazole or Voriconazole for Invasive Aspergillosis in the Phase 3 SECURE and VITAL Trials
Source: PubMed Central journal article supplement (PMC6325202; doi:10.1128/aac.01634-18), 2018-12-21
Supplement: 86e917de5d07eeeaa62166d6d8a45784_AAC.01634-18-s0001.pdf [file 86e917de5d07eeeaa62166d6d8a45784_AAC.01634-18-s0001.pdf]

**TABLE S1** All-cause mortality through Day 42 by baseline MICs for individual and multiple *Aspergillus* spp. isolates: CLSI and EUCAST methodologies

|                                  | MICs ( $\mu\text{g/mL}$ ) <sup>a</sup> |           |           |            |     |     |    |            |
|----------------------------------|----------------------------------------|-----------|-----------|------------|-----|-----|----|------------|
|                                  | 0.25                                   | 0.5       | 1         | 2          | 4   | 8   | 16 | >16        |
| <b>CLSI</b>                      |                                        |           |           |            |     |     |    |            |
| Isavuconazole                    |                                        |           |           |            |     |     |    |            |
| <i>A. flavus</i>                 | -                                      | 0/1       | 1/6 (17%) | 0/2        | 0/1 | -   | -  | -          |
| <i>A. fumigatus</i>              | 0/7                                    | 0/6       | 2/8 (25%) | 0/3        | -   | -   | -  | 1/1 (100%) |
| <i>A. niger</i>                  | -                                      | -         | -         | 1/1 (100%) | 0/4 | 0/2 | -  | -          |
| <i>A. terreus</i>                | 0                                      | 0         | 0/1       | 0          | 0/1 | -   | -  | -          |
| Multiple <i>Aspergillus</i> spp. | 1/2 (50%)                              | 0/2       | -         | 0/1        | -   | -   | -  | -          |
| Voriconazole                     |                                        |           |           |            |     |     |    |            |
| <i>A. flavus</i>                 | -                                      | 0/1       | 0/3       | 1/2 (50%)  | -   | -   | -  | -          |
| <i>A. fumigatus</i>              | 1/1 (100%)                             | 3/4 (75%) | 0/7       | 2/3 (67%)  | -   | -   | -  | -          |
| <i>A. terreus</i>                | -                                      | -         | 0/1       | -          | -   | -   | -  | -          |

---

**EUCAST**

---

**Isavuconazole**

---

|                                  |           |     |            |           |     |     |   |            |
|----------------------------------|-----------|-----|------------|-----------|-----|-----|---|------------|
| <i>A. flavus</i>                 | 0/1       | -   | 0/3        | 1/6 (17%) | -   | -   | - | -          |
| <i>A. fumigatus</i>              | 0/5       | 0/6 | 2/11 (18%) | 0/2       | -   | -   | - | 1/1 (100%) |
| <i>A. niger</i>                  | -         | -   | -          | 1/2 (50%) | 0/3 | 0/2 | - | -          |
| <i>A. terreus</i>                | -         | 0/1 | -          | 0/1       | -   | -   | - | -          |
| Multiple <i>Aspergillus</i> spp. | 1/2 (50%) | -   | 0/2        | 0/1       | -   | -   | - | -          |

---

**Voriconazole**

---

|                     |   |           |           |            |   |   |            |   |
|---------------------|---|-----------|-----------|------------|---|---|------------|---|
| <i>A. flavus</i>    | - | -         | 0/5       | 1/1 (100%) | - | - | -          | - |
| <i>A. fumigatus</i> | - | 4/9 (44%) | 1/3 (33%) | 0/2        | - | - | 1/1 (100%) | - |
| <i>A. terreus</i>   | - | 0/1       | -         | -          | - | - | -          | - |

---

<sup>a</sup>The denominator is the number of patients whose isolates had that MIC (where patients had multiple isolates, the isolate with the highest baseline MIC was used); the numerator denotes the number of patients who died. A patient with the last known survival status was before Day 42 or missing and the last assessment day was before Day 42 was treated as death.

Only baseline samples are included in this summary.

CLSI, Clinical and Laboratory Standards Institute; EUCAST, European Committee on Antimicrobial Susceptibility Testing; MIC, minimum inhibitory concentration.

**Table S2** DRC-Assessment definitions of clinical, mycological, and radiological responses in the SECURE and VITAL trials

| <b>Outcome</b>    | <b>Clinical response</b>                                                                                                                                                                                                                                                              |
|-------------------|---------------------------------------------------------------------------------------------------------------------------------------------------------------------------------------------------------------------------------------------------------------------------------------|
| Success           | Complete or partial resolution of attributable clinical symptoms and physical findings                                                                                                                                                                                                |
| Failure           | No resolution of any attributable clinical symptoms and physical findings and/or worsening                                                                                                                                                                                            |
| Not applicable    | No attributable signs and symptoms present at baseline and no symptoms attributable to invasive fungal disease developed post baseline                                                                                                                                                |
| <b>Outcome</b>    | <b>Mycological response</b>                                                                                                                                                                                                                                                           |
| Success           | Documented or presumed eradication                                                                                                                                                                                                                                                    |
| Failure           | Persistence or presumed persistence                                                                                                                                                                                                                                                   |
| Not applicable    | No mycological evidence available at baseline                                                                                                                                                                                                                                         |
| <b>Time point</b> | <b>Radiological response</b>                                                                                                                                                                                                                                                          |
| Day 42            | <ul style="list-style-type: none"> <li>• Success (improvement of at least 25% from baseline)</li> <li>• Failure</li> <li>• No post-baseline radiology available for patient with baseline evidence of radiological disease</li> <li>• Radiology not applicable at baseline</li> </ul> |

- Day 84
- Success (improvement of at least 50% from baseline)
  - Failure
  - No post-baseline radiology available for patient with baseline evidence of radiological disease
  - Radiology not applicable at baseline

- 
- EOT
- Success (improvement of at least 25% from baseline [if EOT occurred prior to day 42] or at least 50% from baseline [if EOT occurred after day 42])
  - Failure
  - No post-baseline radiology available for patient with baseline evidence of radiological disease
  - Radiology not applicable at baseline

---

DRC, data review committee; EOT, end of treatment.

**TABLE S3** Overall, clinical, and mycological response at EOT by baseline MICs for individual and multiple *Aspergillus* spp. isolates: CLSI and EUCAST methodologies

| Outcome             |                     | MICs ( $\mu\text{g/mL}$ ) <sup>a</sup> |            |           |            |            |            |    |     |
|---------------------|---------------------|----------------------------------------|------------|-----------|------------|------------|------------|----|-----|
|                     |                     | 0.25                                   | 0.5        | 1         | 2          | 4          | 8          | 16 | >16 |
| <b>CLSI</b>         |                     |                                        |            |           |            |            |            |    |     |
| Isavuconazole       |                     |                                        |            |           |            |            |            |    |     |
| <i>A. flavus</i>    | Overall success     | -                                      | 1/1 (100%) | 4/6 (67%) | 1/2 (50%)  | 0/1        | -          | -  | -   |
|                     | Clinical success    | -                                      | 1/1 (100%) | 5/6 (83%) | 1/2 (50%)  | 1/1 (100%) | -          | -  | -   |
|                     | Mycological success | -                                      | 1/1 (100%) | 4/6 (67%) | 1/2 (50%)  | 0/1        | -          | -  | -   |
| <i>A. fumigatus</i> | Overall success     | 3/7 (43%)                              | 3/6 (50%)  | 2/8 (25%) | 2/3 (67%)  | -          | -          | -  | 0/1 |
|                     | Clinical success    | 5/7 (71%)                              | 6/6 (100%) | 3/8 (38%) | 3/3 (100%) | -          | -          | -  | 0/1 |
|                     | Mycological success | 3/7 (43%)                              | 4/5 (67%)  | 3/8 (38%) | 2/3 (67%)  | -          | -          | -  | 0/1 |
| <i>A. niger</i>     | Overall success     | -                                      | -          | -         | 0/1        | 3/4 (75%)  | 1/2 (50%)  | -  | -   |
|                     | Clinical success    | -                                      | -          | -         | 0/1        | 3/4 (75%)  | 2/2 (100%) | -  | -   |

|                         |                     |           |            |            |            |           |           |   |   |
|-------------------------|---------------------|-----------|------------|------------|------------|-----------|-----------|---|---|
|                         | Mycological success | -         | -          | -          | 0/1        | 3/4 (75%) | 1/2 (50%) | - | - |
| <i>A. terreus</i>       | Overall success     | -         | -          | 0/1        | -          | 0/1       | -         | - | - |
|                         | Clinical success    | -         | -          | 1/1 (100%) | -          | 0/1       | 5-        | - | - |
|                         | Mycological success | -         | -          | 0/1        | -          | 0/1       | -         | - | - |
| Multiple                | Overall success     | 1/2 (50%) | 1/2 (50%)  | -          | 0/1        | -         | -         | - | - |
| <i>Aspergillus spp.</i> | Clinical success    | 1/2 (50%) | 2/2 (100%) | -          | 1/1 (100%) | -         | -         | - | - |
|                         | Mycological success | 1/2 (50%) | 1/2 (50%)  | -          | 0/1        | -         | -         | - | - |
| Voriconazole            |                     |           |            |            |            |           |           |   |   |
| <i>A. flavus</i>        | Overall success     | -         | 0/1        | 3/3 (100%) | 1/2 (50%)  | -         | -         | - | - |
|                         | Clinical success    | -         | 1/1 (100%) | 2/3 (67%)  | 1/2 (50%)  | -         | -         | - | - |
|                         | Mycological success | -         | 0/1        | 3/3 (100%) | 1/2 (50%)  | -         | -         | - | - |

|                     |                     |            |            |            |            |   |   |   |   |
|---------------------|---------------------|------------|------------|------------|------------|---|---|---|---|
| <i>A. fumigatus</i> | Overall success     | 0/1        | 1/4 (25%)  | 4/7 (57%)  | 0/3        | - | - | - | - |
|                     | Clinical success    | 0/1        | 1/4 (25%)  | 7/7 (100%) | 3/3 (100%) | - | - | - | - |
|                     | Mycological success | 0/1        | 1/4 (25%)  | 5/7 (71%)  | 0/3        | - | - | - | - |
| <i>A. terreus</i>   | Overall success     | -          | -          | 0/1        | -          | - | - | - | - |
|                     | Clinical success    | -          | -          | 1/1 (100%) | -          | - | - | - | - |
|                     | Mycological success | -          | -          | 0/1        | -          | - | - | - | - |
| <b>EUCAST</b>       |                     |            |            |            |            |   |   |   |   |
| Isavuconazole       |                     |            |            |            |            |   |   |   |   |
| <i>A. flavus</i>    | Overall success     | 1/1 (100%) | -          | 2/3 (67%)  | 3/6 (50%)  | - | - | - | - |
|                     | Clinical success    | 1/1 (100%) | -          | 3/3 (100%) | 4/6 (67%)  | - | - | - | - |
|                     | Mycological success | 1/1 (100%) | -          | 2/3 (67%)  | 3/6 (50%)  | - | - | - | - |
| <i>A. fumigatus</i> | Overall success     | 2/5 (40%)  | 4/6 (67%)  | 3/11 (27%) | 1/2 (50%)  | - | - | - | - |
|                     | Clinical success    | 3/5 (60%)  | 6/6 (100%) | 6/11 (55%) | 2/2 (100%) | - | - | - | - |



|                                  |                     |           |            |            |            |           |            |   |   |
|----------------------------------|---------------------|-----------|------------|------------|------------|-----------|------------|---|---|
|                                  | Mycological success | 2/5 (40%) | 4/6 (67%)  | 5/11 (45%) | 1/2 (50%)  | -         | -          | - | - |
| <i>A. niger</i>                  | Overall success     | -         | -          | -          | 1/2 (50%)  | 1/3 (33%) | 2/2 (100%) | - | - |
|                                  | Clinical success    | -         | -          | -          | 1/2 (50%)  | 2/3 (67%) | 2/2 (100%) | - | - |
|                                  | Mycological success | -         | -          | -          | 1/2 (50%)  | 1/3 (33%) | 2/2 (100%) | - | - |
| <i>A. terreus</i>                | Overall success     | -         | 0/1        | -          | 0/1        | -         | -          | - | - |
|                                  | Clinical success    | -         | 1/1 (100%) | -          | 0/1        | -         | -          | - | - |
|                                  | Mycological success | -         | 0/1        | -          | 0/1        | -         | -          | - | - |
| Multiple <i>Aspergillus</i> spp. | Overall success     | 1/2 (50%) | -          | 1/2 (50%)  | 0/1        | -         | -          | - | - |
|                                  | Clinical success    | 1/2 (50%) | -          | 2/2 (100%) | 1/1 (100%) | -         | -          | - | - |
|                                  | Mycological success | 1/2 (50%) | -          | 1/2 (50%)  | 0/1        | -         | -          | - | - |
| Voriconazole                     |                     |           |            |            |            |           |            |   |   |

|                     |                     |   |            |            |            |   |   |     |   |
|---------------------|---------------------|---|------------|------------|------------|---|---|-----|---|
| <i>A. flavus</i>    | Overall success     | - | -          | 4/5 (100%) | 0/1        | - | - | -   | - |
|                     | Clinical success    | - | -          | 4/5 (100%) | 0/1        | - | - | -   | - |
|                     | Mycological success | - | -          | 4/5 (100%) | 0/1        | - | - | -   | - |
| <i>A. fumigatus</i> | Overall success     | - | 3/9 (33%)  | 1/3 (33%)  | 1/2 (50%)  | - | - | 0/1 | - |
|                     | Clinical success    | - | 5/9 (56%)  | 2/3 (67%)  | 2/2 (100%) | - | - | 0/1 | - |
|                     | Mycological success | - | 4/9 (44%)  | 1/3 (33%)  | 1/2 (50%)  | - | - | 0/1 | - |
| <i>A. terreus</i>   | Overall success     | - | 0/1        | -          | -          | - | - | -   | - |
|                     | Clinical success    | - | 1/1 (100%) | -          | -          | - | - | -   | - |
|                     | Mycological success | - | 0/1        | -          | -          | - | - | -   | - |

<sup>a</sup>The denominator is the number of patients whose isolates had that MIC (where patients had multiple isolates, the isolate with the highest baseline MIC was used); the numerator denotes the number of patients who demonstrated a response of success.

CLSI, Clinical and Laboratory Standards Institute; EOT, end of treatment; MIC, minimum inhibitory concentration; EOT, end of treatment; EUCAST, European Committee on Antimicrobial Susceptibility Testing; MIC, minimum inhibitory concentration.

**FIG S1** Overall, clinical, and mycological response in patients with *Aspergillus* spp. only at EOT by MICs for *Aspergillus* spp. isolates by CLSI methodologies.

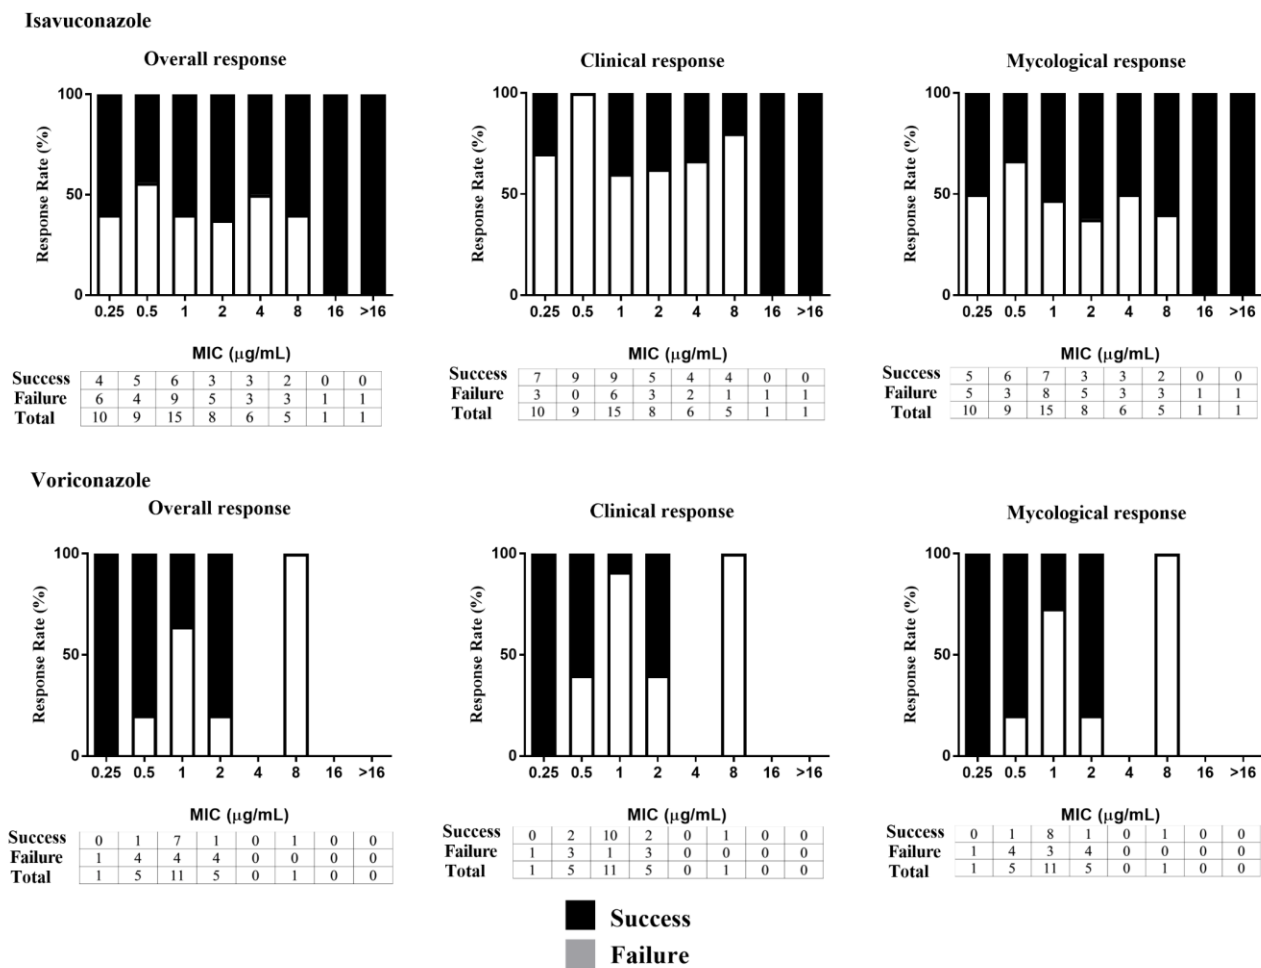

Baseline isolates from patients in the isavuconazole arm were tested with isavuconazole; baseline isolates from patients in the voriconazole arm were tested with voriconazole; where patients had multiple isolates, the isolate with the highest baseline MIC was used.

CLSI, Clinical and Laboratory Standards Institute; EOT, end of treatment; MIC, minimum inhibitory concentration.
